# Supplementary material for: Prospective randomized controlled trial to compare laparoscopic distal gastrectomy (D2 lymphadenectomy plus complete mesogastrium excision, D2 + CME) with conventional D2 lymphadenectomy for locally advanced gastric adenocarcinoma: study protocol for a randomized controlled trial
Source: Springer Nature journal article supplement (doi:10.1186/s13063-018-2790-5), 2018-08-09
Supplement: MOESM2 [file 16023978]

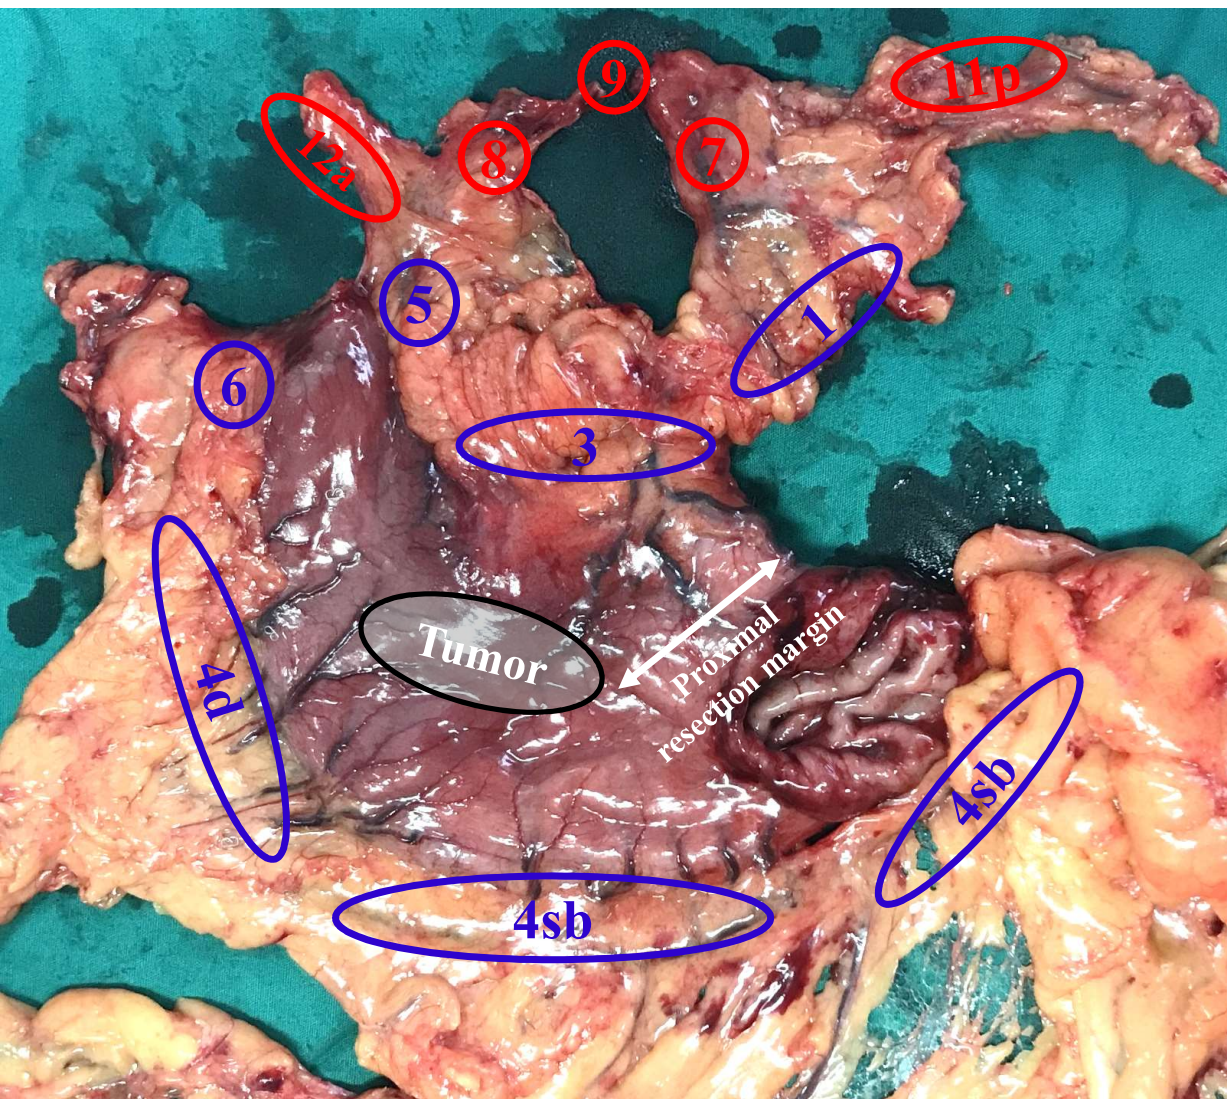

### Proximal resection margin

At least 3 cm for T2 or deeper tumors with an expansive growth pattern;

At least 5 cm for those with infiltrative growth pattern.

### Removal lymph nodes:

#### *N1 station (perigastric)*

1. Right cardiac nodes
3. Nodes along lesser curvature
- 4sb. Nodes along greater curvature (left gastroepiploic vessels)
- 4d. Nodes along greater curvature (right gastroepiploic vessels)
5. Supra-pyloric nodes
6. Infra-pyloric nodes

#### *N2 station (branches coeliac axis)*

7. Nodes along root left gastric artery
8. Nodes along common hepatic artery
9. Nodes around coeliac axis
- 11p. Nodes along splenic artery (proximal)
- 12a. Nodes at hepatoduodenal ligament (hepatic artery)
