# Supplementary material for: Prospective randomized controlled trial to compare laparoscopic distal gastrectomy (D2 lymphadenectomy plus complete mesogastrium excision, D2 + CME) with conventional D2 lymphadenectomy for locally advanced gastric adenocarcinoma: study protocol for a randomized controlled trial
Source: Springer Nature journal article supplement (doi:10.1186/s13063-018-2790-5), 2018-08-09

**Scored 2**

**Scored 1**

**Scored 0**

**Tri-junction point exposure**

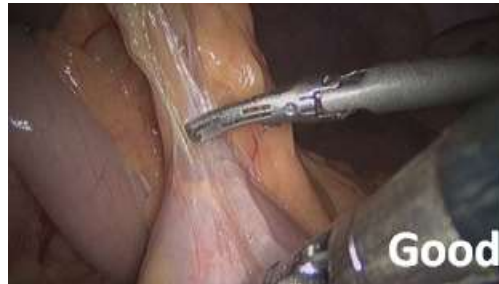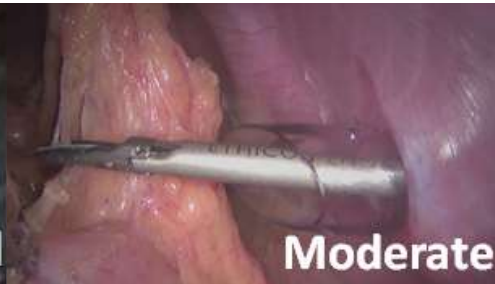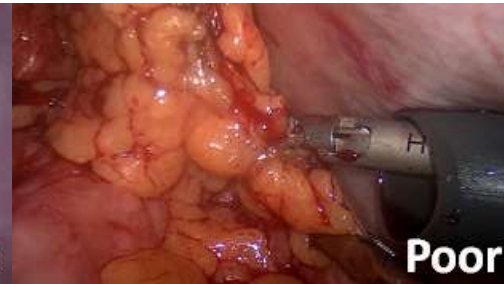

**Mesogastrium body**

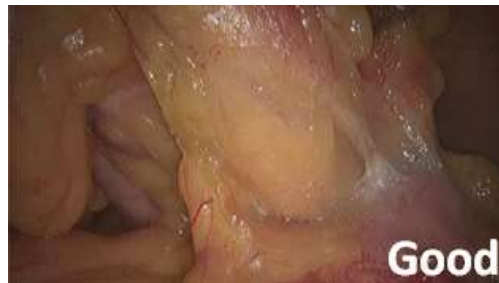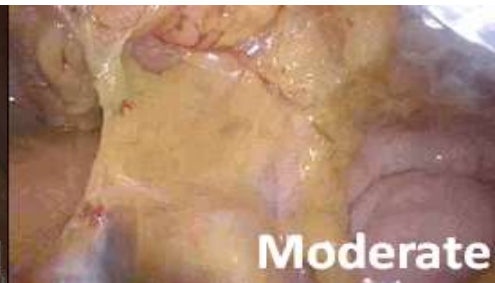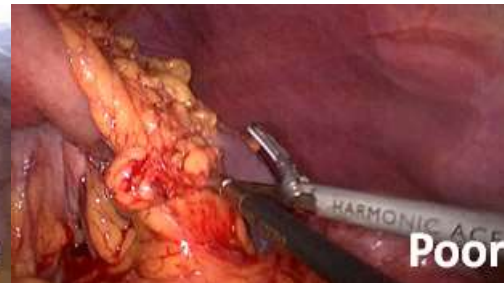

**Smooth plane of surgical bed**

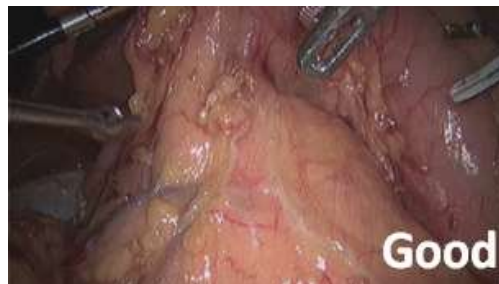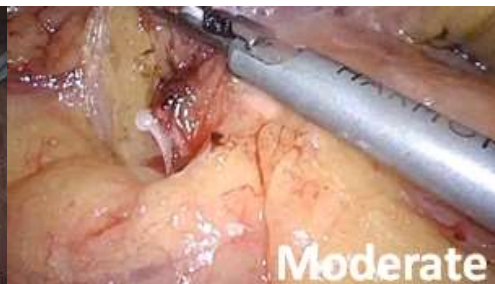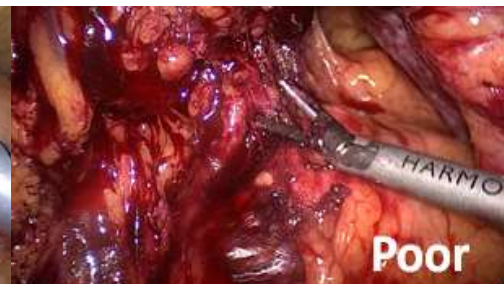

**High tie ligation of vessels**

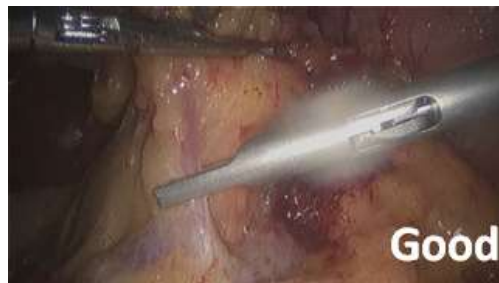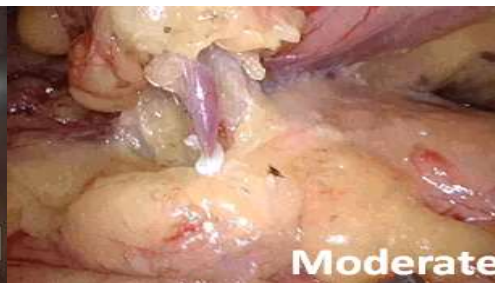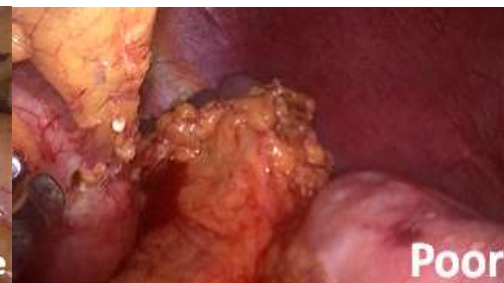

Supplement: MOESM3 [file 16023978]
