# Supplementary material for: Prospective randomized controlled trial to compare laparoscopic distal gastrectomy (D2 lymphadenectomy plus complete mesogastrium excision, D2 + CME) with conventional D2 lymphadenectomy for locally advanced gastric adenocarcinoma: study protocol for a randomized controlled trial
Source: Springer Nature journal article supplement (doi:10.1186/s13063-018-2790-5), 2018-08-09
Supplement: MOESM4 [file 16023978]

## Evaluation Score Table of Mesenteric Excision

No.

Video Record ID:

Evaluation Date:

### ***1. Left Gastroepiploic Mesogastrium:***

- a) Tri-junction point exposure (2: Good; 1: Moderate; 0: Poor) Score: \_\_\_
- b) Mesogastrium body (2: Good; 1: Moderate; 0: Poor) Score: \_\_\_
- c) Smooth plane of surgical bed (2: Good; 1: Moderate; 0: Poor) Score: \_\_\_
- d) High tie ligation of vessels (2: Good; 1: Moderate; 0: Poor) Score: \_\_\_

**Mesenteric Score: \_\_\_\_\_**

### ***2. Right Gastroepiploic Mesogastrium:***

- a) Tri-junction point exposure (2: Good; 1: Moderate; 0: Poor) Score: \_\_\_
- b) Mesogastrium body (2: Good; 1: Moderate; 0: Poor) Score: \_\_\_
- c) Smooth plane of surgical bed (2: Good; 1: Moderate; 0: Poor) Score: \_\_\_
- d) High tie ligation of vessels (2: Good; 1: Moderate; 0: Poor) Score: \_\_\_

**Mesenteric Score: \_\_\_\_\_**

### ***3. Left Mesogastrium:***

- a) Tri-junction point exposure (2: Good; 1: Moderate; 0: Poor) Score: \_\_\_
- b) Mesogastrium body (2: Good; 1: Moderate; 0: Poor) Score: \_\_\_
- c) Smooth plane of surgical bed (2: Good; 1: Moderate; 0: Poor) Score: \_\_\_
- d) High tie ligation of vessels (2: Good; 1: Moderate; 0: Poor) Score: \_\_\_

**Mesenteric Score: \_\_\_\_\_**

### ***4. Right Mesogastrium:***

- a) Tri-junction point exposure (2: Good; 1: Moderate; 0: Poor) Score: \_\_\_
- b) Mesogastrium body (2: Good; 1: Moderate; 0: Poor) Score: \_\_\_
- c) Smooth plane of surgical bed (2: Good; 1: Moderate; 0: Poor) Score: \_\_\_
- d) High tie ligation of vessels (2: Good; 1: Moderate; 0: Poor) Score: \_\_\_

**Mesenteric Score: \_\_\_\_\_**

### ***5. Posterior Mesogastrium:***

**Mesenteric Score (2: Good; 1: Moderate; 0: Poor): \_\_\_\_\_**

**Total Score:**

**Qualified (Yes/No):**

**Inspector Signature:**
